1 **Effectiveness of ten-valent pneumococcal conjugate vaccine on invasive pneumococcal disease**  
2 **among children <2 years old: a prospective population-based study in rural Bangladesh**

3 Roly Malaker<sup>1</sup>, Md Hassanuzaman<sup>1</sup>, Hafizur Rahman<sup>1</sup>, Rajib Chandra Das<sup>1</sup>, Naito Kanon<sup>1</sup>, Senjuti  
4 Saha<sup>1</sup>, Yogesh Hooda<sup>1</sup>, Arif M Tanmoy<sup>1</sup>, Sowmitra Ranjan Chakraborty<sup>1</sup>, Shampa Saha<sup>1</sup>, Maksuda  
5 Islam<sup>1</sup>, Gary L. Darmstadt<sup>2</sup>, Abdullah H Baqui<sup>3</sup>, Mathuram Sathosam<sup>3</sup>, Shams El-Arifeen<sup>4</sup>, Cynthia  
6 G Whitney<sup>5</sup>, Samir K Saha<sup>1,6</sup>

7 1: Child Health Research Foundation, Dhaka, Bangladesh

8 2: Department of Pediatrics, Stanford University School of Medicine, Stanford, CA, USA

9 3: Johns Hopkins Bloomberg School of Public Health, Baltimore, USA

10 4: International Centre for Diarrhoeal Disease Research, Bangladesh, Dhaka, Bangladesh

11 5: Rollins School of Public Health, Emory University, Atlanta, USA

12 6: Bangladesh Shishu Hospital and Institute, Dhaka, Bangladesh

13

14 **Keywords:** PCV10, invasive pneumococcal disease, pneumonia, vaccine impact, indirect cohort,  
15 Bangladesh, children

16

17 **# Address correspondence to:**

18 Samir K Saha: [samir@chrfd.org](mailto:samir@chrfd.org)

19 Telephone: +8801713461254

20 **Abstract:**

21 The 10-valent pneumococcal conjugate vaccine (PCV10) was introduced in March 2015 in  
22 Bangladesh. In this study, we aimed to estimate the impact of PCV10 on invasive pneumococcal  
23 disease (IPD) identified by blood cultures and severe pneumonia identified clinically and its  
24 effectiveness on invasive disease caused by vaccine serotypes.

25  
26 We conducted population-based surveillance among children aged 2- <24 months between April  
27 2012 through March 2019 in Mirzapur, a rural sub-district of Bangladesh. We compared incidence  
28 of IPD and severe pneumonia before (April 2012 to March 2015) and after (April 2015 to March  
29 2019) the introduction of PCV10. Vaccine effectiveness was measured using an indirect cohort  
30 analysis of data from four sentinel sites in which PCV10 vaccination status was compared among  
31 children with IPD caused by vaccine serotype vs. non-vaccine serotypes.

32  
33 We identified 24 IPD cases by blood culture and 1,704 severe pneumonia hospitalizations during  
34 the surveillance period. IPD incidence in under-2-year-old children fell 25% (95% CI: -1.2% to 76%;  
35 p-value =0.59) from 106 cases per 100,000 person-years at baseline to 79.3 in April 2018- March  
36 2019. Vaccine serotype-IPD incidence was lower (77% reduction, 95% CI: -0.45% to 96%; p-value  
37 =0.068) in April 2018 - March 2019 than in the pre-vaccine period (85.7 cases to 19.8/100,000  
38 observation-years). A significant decline of 54.0% (95% CI: 47.0% to 59.0%; p-value <0.001) was  
39 observed in hospitalizations due to severe pneumonia. From indirect cohort analysis, the  
40 effectiveness of PCV10 against vaccine serotype IPD was 37% (95% CI: -141.0% to 83.5%; p= 0.5)  
41 after the 1<sup>st</sup> dose and 63.1% (95% CI: -3.3% to 85.9%, p=0.0411) after the 2<sup>nd</sup> or the 3<sup>rd</sup> dose.

42

43 This study demonstrates that PCV10 introduction prevented hospitalizations with severe  
44 pneumonia and provided individual protection against vaccine serotypes.

45

46 **Introduction:**

47 *Streptococcus pneumoniae* is the leading cause of childhood invasive diseases, including  
48 pneumonia, sepsis, and meningitis, worldwide (1, 2). Approximately 45 million episodes of severe  
49 pneumococcal disease occurred in 2016, leading to 350,000 deaths among children aged <5 years  
50 (3, 4). According to an estimate from 2000, 21,000 deaths occur annually in Bangladesh from  
51 pneumococcal disease (2). Effective vaccines against *S. pneumoniae* became available for children  
52 in 2000, and the World Health Organization (WHO) recommended the inclusion of Pneumococcal  
53 Conjugate Vaccine (PCV) in childhood immunization programs in 2006 (5). However, lack of data  
54 on the impact of immunization in low-income settings and the limited number of serotypes  
55 included in the first formulation (PCV7) hindered institution of data-driven decisions by  
56 policymakers from Gavi-eligible countries, which suffer the highest disease burden (2, 3). PCV was  
57 initially introduced in the USA and other affluent countries where it led to significant reductions in  
58 invasive pneumococcal disease (IPD) among children (3, 6-8). Many countries, however, observed  
59 the emergence of non-vaccine serotypes (NVTs), which partially offset the success of vaccination  
60 (9). Because of this observation, WHO emphasized the importance of monitoring the impact of  
61 PCVs after their introduction into routine vaccination programs (10).

62

63 We have been generating data from both hospital- and population-based surveillance since 2004  
64 in Bangladesh. These data have been used to estimate the burden of pneumococcal disease in  
65 South Asia (11-13). Since 2004, our team has maintained both community- and hospital-based  
66 surveillance in Mirzapur, a rural region in Bangladesh, to assess the burden of IPD (13), in addition  
67 to conducting hospital-based surveillance in three additional sites across the country. The  
68 Bangladesh government introduced PCV10 (Synflorix, GSK) into its Expanded Program on  
69 Immunization (EPI) in March 2015, to children in a 3-dose primary series at 6, 10 and 14 weeks  
70 after birth.

71  
72 In this study, we measured vaccine impact on pneumococcal disease in children aged <2 years in  
73 Mirzapur subdistrict by comparing data from the pre-vaccine period (April 2012 - March 2015) to  
74 that from the post-vaccine period (April 2015- March 2019). Pneumococcal pneumonia is mostly  
75 non-bacteremic in this setting, and thus isolation of this organism in the bloodstream is rare.  
76 Therefore, we aimed: 1) to measure the impact of vaccine by comparing incidence before and  
77 after introduction of PCV10 on: a) the number of laboratory-confirmed IPD cases, and b) the  
78 number of severe pneumonia cases identified clinically by physicians among children <2 years of  
79 age, and 2) to analyze the effectiveness of PCV10 against vaccine type (VT)-IPD using an indirect  
80 cohort method and data from laboratory-based surveillance.

81

## 82 **Methods**

### 83 **Study design**

84 To achieve the study objectives, we used two different study design approaches: (1) a before-after  
85 study in Mirzapur based on community surveillance for suspected pneumococcal disease and  
86 hospital case detection of blood culture-proven IPD at the population level to compare: a) overall,  
87 vaccine type (VT) and non-vaccine type (NVT) IPD incidence, and b) incidence of severe  
88 pneumonia, and (2) an indirect cohort study design using four sites, including the Mirzapur site,  
89 to assess the effectiveness of the PCV-10 against VTs, with IPD cases identified in Mirzapur and  
90 three other surveillances sites of the World Health Organization (WHO)-supported Invasive  
91 Bacterial Vaccine-Preventable Disease Surveillance Network sentinel site hospitals (11).

92

### 93 **Study site, population, and surveillance system:**

94 Population-based surveillance was conducted at Mirzapur, Bangladesh, 65 km north of Dhaka. In  
95 2011, Mirzapur had an estimated total population of 400,000, distributed in 14 unions and 219  
96 villages. The Kumudini Women's Medical College Hospital (KWMCH) is the main health care facility  
97 for the population of Mirzapur. The study hospital (KWMCH) is the largest (1280-bed) non-profit  
98 private hospital in Bangladesh.

99

100 Ten of the 14 unions (Figure 1A) were covered by the demographic surveillance system. This  
101 demographic surveillance population is an open cohort; information on vital events like migration,  
102 pregnancy outcomes, births and deaths were recorded every fourth month. Children residing  
103 within the study area were eligible for this community-based surveillance. Trained Village Health  
104 Workers (VHWs) enrolled children in the community surveillance soon after birth once the primary  
105 guardian consented to the child's participation. At enrollment, each baby was assigned a unique

106 barcode which was printed on a smart card and remained valid until the child turned 5 years of  
107 age. The barcoded smart cards were used to identify the children and their study area. Most of  
108 the <5 children received care at the study hospital (Figure 1B), which was provided free of charge  
109 through Child Health Research Foundation (CHRF) support.

110  
111 In the pre-vaccine period, surveillance was carried out in four unions; during the post-vaccine  
112 period, surveillance was extended to six additional unions, for a total of ten (Figure 1A). VHWs  
113 visited all children in their designated area once a week and inquired about the child's well-being.  
114 If the mother/caregiver reported that a child had fever, cough or difficulty breathing, the VHW  
115 assessed the sick child using an algorithm (Table 1). The child was referred to KWMCH (Figure 1B)  
116 for medical care if the child met criteria provided in the algorithm for signs and symptoms of  
117 possible severe pneumonia/very severe disease, or high fever/possible sepsis. Children who were  
118 referred by VHWs or brought to the clinic due to family concerns of illness were evaluated clinically  
119 by a study physician who provided appropriate care and obtained specimens as indicated for  
120 identification of IPD.

121  
122 Specimens (blood and/or CSF) for identification of IPD were collected from children who met the  
123 case definition of pneumonia, severe pneumonia, meningitis, and/or sepsis according to the WHO.  
124 The following case definitions were used by the study physicians of all four hospitals in the  
125 surveillance network to identify children with suspected pneumococcal disease in whom blood  
126 cultures were obtained for confirmation of IPD:

- 127 a. *Pneumonia*: Pneumonia was defined as history of cough or breathing difficulty with fast  
128 breathing (respiration rate  $\geq 50$ /min for children 2- <12 months of age,  $\geq 40$ /min for  
129 children  $\geq 12$  months of age).
- 130 b. *Severe pneumonia (physician confirmed)*: A case of severe pneumonia was defined as  
131 history of cough or breathing difficulty and presence of any of the following danger  
132 signs (chest indrawing, inability to drink/breast feed, substantial vomiting, convulsions,  
133 lethargy, or fast breathing (respiratory rate  $\geq 60$  breaths/min in children <2 months  
134 of age), stridor in a calm child, altered consciousness).
- 135 c. *Meningitis*: A case of meningitis was defined as sudden onset of fever ( $>100.4^{\circ}\text{F}$ ) and  
136 presence of at least one of the following: neck stiffness, altered consciousness, bulging  
137 fontanel if <12 months of age, lethargy, convulsions, toxic appearance,  
138 petechial/purpurial rash, poor sucking, or irritability.
- 139 d. *Sepsis*: A case of sepsis was defined as presence of any of the following danger signs  
140 (inability to drink/breast feed, convulsions, lethargy, stridor in a calm child, persistent  
141 vomiting, or severe malnutrition) excluding pneumonia and meningitis features.

142

143 Children aged 2 – <24 months who presented to the four study hospitals with suspected  
144 pneumococcal disease based on clinical examination were enrolled in the hospital surveillance  
145 portion of the study if their parents or legal guardian provided informed written consent for  
146 recording clinical features and collecting specimens. In this study, children with severe pneumonia  
147 met the clinical case definition of severe pneumonia but had negative blood cultures; IPD cases

148 met any one of the 4 clinical case definitions and had a positive blood and/or CSF culture for *S.*  
149 *pneumoniae*.

150

### 151 **Study design**

152 To achieve the study objectives, we used two different study design approaches: (1) a before-after  
153 study in Mirzapur based on community surveillance for suspected pneumococcal disease and  
154 hospital case detection of blood culture-proven IPD at population level to compare: a) overall,  
155 vaccine type (VT) and non-vaccine type (NVT) IPD incidence, and b) incidence of severe  
156 pneumonia, and (2) an indirect cohort study design (using four sites, including the Mirzapur site)  
157 to assess the effectiveness of the PCV-10 against VTs, with IPD cases identified at KWMCH in  
158 Mirzapur and three other WHO - supported Invasive Bacterial Vaccine-Preventable Disease  
159 Surveillance Network sentinel site hospitals, namely, Bangladesh Shishu Hospital and Institute  
160 (formerly named as Dhaka Shishu Hospital), Dr. MR Khan Shishu Shasthya Foundation Hospital and  
161 Institute of Child Health, and Chittagong Ma O Shishu Hospital.

162

### 163 **Before-after comparison of incidence of IPD among 2- <24-month-old children:**

164 For calculation of IPD incidence in Mirzapur during the pre- and post-PCV10 introduction, IPD cases  
165 among children aged 2 – <24 months who presented to KWMCH were identified using standard  
166 laboratory methods for culture and identification of pneumococci from blood or CSF (14). The  
167 number of total IPD cases identified among 2 - <24-month-old children was used as the numerator  
168 and child-years observed was used as denominator for estimation of overall crude incidence.  
169 Incidence of VT and NVT IPD cases were calculated similarly using subsets of IPD cases. To measure



170 changes in incidence rates, we compared incidence for four post-vaccine years (April 2015 - March  
171 2019) with that of three pre-vaccine years (April 2012 - March 2015).

172

173 **Comparison of incidence of severe pneumonia between pre-and post-vaccine periods among**  
174 **children 2 - <24 months old**

175 Like IPD incidence, we measured the crude incidence of severe pneumonia identified clinically  
176 among all children aged 2- <24 months who came to KWMCH from the study area (self-referred  
177 and VHW-referred). The number of severe pneumonia cases in this population was considered as  
178 the numerator and child-years observed as the denominator. The crude incidence was adjusted  
179 based on failure of VHW-referred cases to come to the study hospital out-patient department.

180

181 **Indirect Cohort Analysis**

182 To calculate vaccine effectiveness, vaccination status for children with VT-IPD at all four study  
183 hospitals was compared with vaccination status of children with NVT-IPD; the method assumes  
184 that vaccination does not impact the risk for non-vaccine-type disease among vaccinated  
185 individuals. A recent analysis found that results using the indirect cohort method were comparable  
186 to that of a standard case-control study (15), which is complex and difficult to implement. In this  
187 analysis, VT-IPD (PCV10) was defined as cases of IPD in whom PCV10 serotypes and 6A (known to  
188 be cross-protected by PCV10) were identified. All other serotypes were considered NVT. All IPD  
189 cases with known serotypes collected from the four WHO sentinel hospitals from April 2015  
190 through March 2019 were used for this analysis. Based on the card-verified immunization status,  
191 children with IPD were categorized into two groups: vaccinated and unvaccinated. The

192 unvaccinated cohort included verbally confirmed non-vaccinated children and 2 - <24-month-old  
193 children who were not age-eligible for PCV at the time of the initial pneumococcal vaccination  
194 program (21<sup>st</sup> March 2015). As Bangladesh's EPI did not have catch-up campaigns and only  
195 children aged 6 weeks were eligible for vaccine introduction, this strategy led to an increase of  
196 vaccine eligible children gradually with time. To identify vaccine eligible children, we back  
197 calculated the birthdate of children and considered those born on 7<sup>th</sup> February 2015 or later as  
198 eligible to receive the 1<sup>st</sup> dose of pneumococcal vaccine at 6 weeks of age. Children who sought  
199 medical care two weeks or more after receiving an initial dose were considered vaccinated. Any  
200 child who came to the hospital with IPD within <14 days of receiving the 1<sup>st</sup> dose of PCV10 vaccine  
201 was considered non-vaccinated. Children who received two or three doses of PCV-10 were  
202 considered individually for calculating vaccine impact. We calculated the odds ratio of receipt of  
203 PCV10 dose among children who had vaccine-type (PCV10) IPD versus non-vaccine-type IPD and  
204 used logistic regression to estimate vaccine effectiveness using the formula: *Vaccine effectiveness*  
205  $= (1 - \text{odds ratio for PCV10 vaccination}) \times 100\%$ .

206

## 207 **Laboratory methods**

208 Blood specimens were cultured using BACTEC bottles. Beep positive and/or chocolate-colored  
209 blood bottles were screened by culture technique on blood and chocolate agar plates. CSF  
210 specimens were plated directly on blood and chocolate agar plates. In addition, all CSF specimens  
211 underwent testing for pneumococcus using an immunochromatographic method (BinaxNow [14]).  
212 Pneumococcal isolates were serotyped using capsular swelling method (quellung reaction). All  
213 BinaxNow positive specimens were tested for the *lytA* gene of pneumococcus and serotyped using

214 previously published seven multiplex (triplex) and three in-house multiplex (triplex) RT-PCR assays  
215 covering a total of fifty serotypes (1, 2, 3, 4, 5, 6A/6B/6C/6D, 6C/6D, 7A/7F, 7B/C, 8, 9V/9A, 10A/F,  
216 11A/D, 12F/12A/12B/44/46, 13, 14, 15A/B/C/F, 15A/15F, 16F, 18C/18A/18B/18F, 19A, 19F, 20,  
217 22F/22A, 23A, 23F, 33F/33A/37, 34, 35B, 45 and 48) (16).

218  
219 All laboratory methods were conducted at the respective four WHO sentinel site laboratories  
220 except the RT-PCR and capsular swelling, which were done at Bangladesh Shishu Hospital and  
221 Institute.

222

### 223 **Statistical analysis**

224 Statistical analyses were conducted using STATA 14.0 (Stata Corp LP, College Station, TX). Results  
225 were reported as frequencies and percentages for categorical variables. We calculated incidence  
226 rates (per 100,000 child years of observation) and incidence rate ratios (IRR) using Poisson  
227 regression models for VT, NVT, overall IPD and physician confirmed severe pneumonia cases. The  
228 crude incidence calculations were adjusted for rate of compliance with VHW's referral from the  
229 community to the hospital. The corresponding confidence intervals for each IRR and adjusted IRR  
230 were also calculated including their respective p-values. The level of significance was set at 5%,  
231 and p-values <0.05 were considered statistically significant.

232

### 233 **Ethical considerations**

234 The study protocol was reviewed and approved by an independent Ethical Review Board based at  
235 Bangladesh Institute of Child Health, Dhaka, Bangladesh. Informed written consent was obtained

236 by VHWs from the parents of the children before enrollment in community surveillance in  
237 Mirzapur. Informed consent was also obtained for enrollment in hospital surveillance at all four  
238 study hospitals, including collection of clinical data and specimens.

239

## 240 **Results**

### 241 **Comparison of incidence of IPD pre- and post PCV10 introduction in Mirzapur**

242 During the seven-year study period, we enrolled 20,187 children, including 3,395 in the pre-  
243 vaccine period and 16,792 in the post-vaccine period, who were monitored for illness suggestive  
244 of pneumonia or severe pneumonia as well as suspected sepsis and meningitis (Table 1). In total,  
245 these children contributed 34,608 (pre-vaccine, n=9,153 and post-vaccine, n=25,455) child-years  
246 of observation. In the baseline period, 500,295 visits were made by VHWs. Among assessed  
247 children, VHWs referred 2,589 children to KWMCH based on the referral criteria (Table 1); of  
248 these, 1327 (51%) complied and sought care at KWMCH. In the post-vaccine period, 12,830  
249 children were referred by VHWs and 9,437 (73.5%) visited KWMCH (Supplemental Table 1).

250

251 During the pre-vaccine period, 2,617 children (1327 referred by VHWs and 1290 who sought care  
252 on their own) met the eligibility criteria at KWMCH for suspected pneumococcal disease  
253 (pneumonia, severe pneumonia, meningitis, or sepsis). Among these, 1,857 (71.0%) children were  
254 enrolled and had specimens and data collected. Five (0.27%; 5/1,857) blood samples were positive  
255 for pneumococci, four of which were VTs (80.0%). During the post-vaccine period, study physicians  
256 identified 8,342 children with suspected pneumococcal diseases. Of these, 89.8% (n=7487) were  
257 enrolled and subjected to blood culture. A total of nineteen pneumococci (0.25%; 19/7487) were

258 detected, including nine vaccine serotypes (47.3%) and ten non-vaccine serotypes (52.7%; Figure  
259 2).

260

261 During the pre-PCV period, the crude incidence of invasive pneumococcal disease among children  
262 2- <24 months of age in Mirzapur was 54.6 (95% CI: 6.8-102.5) cases per 100,000 child-years  
263 observed. VT-IPD incidence was 43.7 (95% CI: 0.9-86.5) and NVT-IPD was 10.9 (95%CI: 10.5-32.3)  
264 cases per 100,000 child-years. The average crude incidence of VT-IPD in the post-PCV period was  
265 35.6 cases per 100,000 child-years observed (95% CI: -9.6-80.8). During the fourth-year post PCV  
266 introduction (April 2018 – March 2019), VT-IPD declined by 66% from the pre-vaccine period; VT  
267 cases reached 14.8 (95%CI: -14.2 to 43.9) and NVT cases reached 44.5 per 100,000 child-years  
268 (Figure 3A).

269

270 After adjusting for compliance with referrals, average incidence of IPD in the pre-PCV period was  
271 106.1 (95% CI: 39.4-172.8) and post-PCV was 79.3 (95% CI: 12.1-146.6) cases per 100,000 child-  
272 years of observation (Figure 3B). Overall, IPD caused by any serotype declined 25% (p=0.58) among  
273 children under age 2 years. Comparing VT-IPD in the pre- and post-PCV10 periods, we observed a  
274 gradual decline of VT-IPD throughout the study period, with adjusted incidence reaching 19.8  
275 cases in the final (4<sup>th</sup>) year from 85.7/100,000 child-years at baseline, a 77% decline (IRR 0.2;  
276 95%CI: -0.04-1.45; p=0.068). During the 4<sup>th</sup> year of the post-PCV period, incidence of NVT-IPD was  
277 59.5 cases (95% CI: 1.3-117.7) per 100,00 child-years of observation, an increase from 20.4 cases  
278 in the pre-vaccine period (IRR: 2.9, 95% CI: 0.5-16.6; p=0.21). The increase in NVT-IPD was not  
279 driven by any specific serotype (Figure 2).

280

281 **Comparison of incidence of severe pneumonia pre-and post-PCV-10 introduction in Mirzapur**

282 During the baseline period (April 2012 to March 2015), the average crude incidence of severe  
283 pneumonia cases was 50.1/1,000 (95% CI: 45.6-54.7) child-years observed. In the fourth year of  
284 the post-PCV period, incidence of severe pneumonia was lower by 33% (n= 33.8; 95%CI: 21%-44%,  
285 p-value <0.001) compared to baseline. After adjusting for compliance with referrals, the reduction  
286 of severe pneumonia was 54% (95% CI: 47%-59%, p-value <0.001), from 97.4 (95%CI: 91.0-103.8)  
287 cases at baseline to 45.2 cases (95%CI: 40.1-50.3)/1,000 child-years observed in year 4 (Figure 4).

288

289 **PCV10 effectiveness against IPD in four sentinel sites**

290 During the post-vaccine period (23<sup>rd</sup> March 2015- 31<sup>st</sup> March 2019), 171 IPD cases were detected  
291 from children evaluated at the four sentinel sites in Bangladesh (Supplementary figure-1). Among  
292 these children, 140 were eligible for PCV10 based on their age. Serotype information was available  
293 for 118 (84.2%, 118/140) cases, including 21 VT cases and 97 NVT cases. Among these 118 cases,  
294 96 children with 14 VT disease and 82 with NVT disease were vaccinated and 22 with 7 cases of  
295 VT disease and 15 with NVT disease were unvaccinated. The median age of vaccinated children  
296 and unvaccinated children were 5 and 3 months, respectively. Effectiveness of the 1<sup>st</sup> PCV10 dose  
297 was 37.0% (95% CI: -141.0% - 83.5%; p-value =0.49). Two or three doses gave protection of about  
298 63.1% (95% CI: 3.3% – 85.9%; p-value =0.0411) against VT IPD.

299

300 **Discussion**

301 IPD is a major cause of illness in young children in Bangladesh, with 88% (2007-2013) of cases in  
302 children aged <2 years (11). Since this cohort is the main target of the conjugate vaccine,  
303 estimating the effectiveness of pneumococcal vaccine in this vulnerable age group (under 2 years)  
304 is crucial. In addition, understanding the true burden of pneumococcal diseases in Bangladesh is  
305 difficult because most children receive antibiotics before cultures are taken and blood cultures  
306 have low sensitivity for determining pneumonia etiology, even among children who are not  
307 previously treated. Therefore, we measured the impact of PCV10 by examining trends in both  
308 culture-confirmed pneumococcal disease and physician confirmed severe pneumonia cases.

309  
310 Our population-based study revealed that PCV10 introduction was associated with a 77%  
311 reduction in vaccine type (PCV10+6A) IPD and a 25% reduction in overall IPD during the first 4  
312 years of the program, although these reductions were not statistically significant. The decrease in  
313 VT disease observed in this study is concordant with findings in other countries. For example,  
314 within two years of PCV7 introduction in the United States, VT and VT related serotypes declined  
315 by 78% (6). Similarly, South Africa achieved an 85% reduction rate among HIV uninfected children  
316 under 2 years of age within three years of introducing PCV (PCV7 and PCV13) (8). On the other  
317 hand, there have been variations in reduction of overall IPD depending on the diversity of  
318 serotypes. For instance, among children <2 years of age, a 69% decline of overall IPD was observed  
319 in both the United States and South Africa following two and four years of vaccine implementation,  
320 respectively (6, 8). In contrast, in Brazil, the rate of IPD declined 44% among children 2- <24  
321 months old three years following PCV10 induction (17). In Bangladesh, the reduction of overall IPD  
322 was lower (25%) compared to what was measured in some settings [8-10] and like others. This is

323 most likely due to the large diversity of serotypes causing IPD in Bangladesh (51 different invasive  
324 serotypes) along with the persistent >10-year dominance of serotype 2 that we documented (11).  
325 Catch-up programs with vaccination of children up to 2 years of age in the US and up to 24 months  
326 in the United Kingdom (UK) may have resulted in faster drops in VT cases than what we observed  
327 (6, 7, 9).

328  
329 Our study demonstrated a statistically significant reduction (54%,  $p < 0.001$ ) of hospitalization with  
330 severe pneumonia for four years following vaccine introduction in this rural population. Although  
331 WHO proposes use of chest radiograph as a benchmark for evaluating the efficacy of  
332 pneumococcal vaccine (18), this also leads to underestimation of the impact of pneumococcal  
333 vaccine on the pneumonia burden by up to 63% (19). Similarly, a study of PCV10 vaccine  
334 effectiveness against radiologic pneumonia among vaccine eligible children in rural Bangladesh  
335 found 21.4% effectiveness among children 3-11 months of age who received 3 doses of PCV10  
336 (20), lower than the impact we measured but similar to findings from a clinical trial evaluating  
337 PCV10 efficacy against radiological confirmed pneumonia (21). This low effectiveness is possibly  
338 due to high specificity that missed pneumococcal pneumonia cases (19) and serotype  
339 replacement. During this post PCV period, we found an increase of NVT-IPD incidence (IRR: 2.9;  $p$ -  
340 value= 0.21) compared to pre-PCV, which may have occurred in radiologic pneumonia cases as  
341 well. A possible reason of higher effectiveness in our study could be our selection of only severe  
342 pneumonia cases.

343



344 Consistent with other countries using PCV10, our indirect cohort analysis from multiple  
345 contemporary surveillance data showed that PCV10 provides significant protection (63.1%) with  
346 two or more doses of vaccine for under 2-year-old children (15, 22-24). A case-control study from  
347 Pakistan showed effectiveness of PCV10 to be 81.9% against vaccine-type IPD among completely  
348 vaccinated children <5 years (22). An indirect cohort analysis study in Brazil reported 72.8%  
349 effectiveness against VT among children <5 years who had received one or more doses (15). A  
350 serotype-specific effectiveness study from the UK revealed that PCV7 gave less protection (49%)  
351 against 6B compared to the other six serotypes (25, 26). Similar results were seen against 6B in  
352 the USA, where a PCV manufactured by Pfizer was used (27).

353  
354 A strength of our study is the multiple approaches we were able to use to evaluate PCV10 benefits  
355 among children in Bangladesh. We not only measured PCV10 impact on the burden of two types  
356 of pneumococcal disease – IPD and severe pneumonia – using a population-based system, but we  
357 also assessed effectiveness in vaccinated children using an indirect cohort method in four hospitals  
358 with established hospital surveillance for IPD.

359  
360 Multiple limitations should be considered. Overall, impact of PCV in preventing IPD was not  
361 significant, due to the small number of IPD cases during the study period. This low number of  
362 isolates also hindered our ability to measure the impact of vaccine on possible antimicrobial  
363 resistant strains and emergence of NVT in this population. We missed very severe pneumonia  
364 with/without hypoxemia cases, as the study was in our DSS area, where we have active  
365 surveillance and weekly home visits for wellbeing of under-five children, thus resulting in early

366 case detection. Also, VHWs, while trained with attending physicians, might miss some of the  
367 suspected cases of pneumonia, sepsis, and meningitis. This could result in reduction in estimation  
368 of efficacy of the vaccine.

369  
370 Despite these limitations, this study demonstrates that PCV10 is already reducing the morbidity  
371 and possible mortality attributed to pneumococcal infection in a high-risk rural population,  
372 including reducing a substantial number of hospitalizations with severe pneumonia. However,  
373 given the diversity of serotypes causing pneumococcal disease in Bangladesh, ongoing monitoring  
374 is required to capture emergence of NVT which could reduce vaccine impact in the coming years.  
375 Continued surveillance will also help policy makers to make need-based decisions about future  
376 formulations of pneumococcal vaccines. Finally, our findings should encourage the introduction of  
377 lifesaving PCVs in other countries where these vaccines have not yet been introduced.

378

### 379 **Funding**

380 GlaxoSmithKline Biologicals SA provided financial support (Grant number: 200785) to the  
381 demographic surveillance study under the Independent Supported Studies (ISS) Research.  
382 GlaxoSmithKline Biologicals SA was provided the opportunity to review a preliminary version of  
383 this manuscript for factual accuracy, but the authors are solely responsible for final content,  
384 interpretation of the study design, protocol, and execution of the study.

385

### 386 **Author Contribution:**

387

388

389 **Acknowledgement**

390

391

392 **Author's declaration**

393 The authors declare that they have no known competing financial interests or personal

394 relationships that could have appeared to influence the work reported in this paper

395 **Reference:**

- 396 1. Organization WH. Pneumococcal disease 2020 [Available from:  
397 <https://www.who.int/immunization/diseases/pneumococcal/en/>.  
398 2. O'Brien KL, Wolfson LJ, Watt JP, Henkle E, Deloria-Knoll M, McCall N, et al. Burden of  
399 disease caused by Streptococcus pneumoniae in children younger than 5 years: global estimates.  
400 Lancet. 2009;374(9693):893-902.  
401 3. Wahl B, O'Brien KL, Greenbaum A, Majumder A, Liu L, Chu Y, et al. Burden of Streptococcus  
402 pneumoniae and Haemophilus influenzae type b disease in children in the era of conjugate  
403 vaccines: global, regional, and national estimates for 2000-15. Lancet Glob Health.  
404 2018;6(7):e744-e57.  
405 4. Collaborators GBDLRI. Estimates of the global, regional, and national morbidity, mortality,  
406 and aetiologies of lower respiratory infections in 195 countries, 1990-2016: a systematic analysis  
407 for the Global Burden of Disease Study 2016. Lancet Infect Dis. 2018;18(11):1191-210.  
408 5. Organization WH. Pneumococcal conjugate vaccine for childhood immunization--WHO  
409 position paper. Wkly Epidemiol Rec. 2007;82(12):93-104.  
410 6. Whitney CG, Farley MM, Hadler J, Harrison LH, Bennett NM, Lynfield R, et al. Decline in  
411 invasive pneumococcal disease after the introduction of protein-polysaccharide conjugate  
412 vaccine. N Engl J Med. 2003;348(18):1737-46.  
413 7. Waight PA, Andrews NJ, Ladhani SN, Sheppard CL, Slack MP, Miller E. Effect of the 13-valent  
414 pneumococcal conjugate vaccine on invasive pneumococcal disease in England and Wales 4 years  
415 after its introduction: an observational cohort study. Lancet Infect Dis. 2015;15(5):535-43.  
416 8. von Gottberg A, de Gouveia L, Tempia S, Quan V, Meiring S, von Mollendorf C, et al. Effects  
417 of vaccination on invasive pneumococcal disease in South Africa. N Engl J Med.  
418 2014;371(20):1889-99.  
419 9. Ladhani SN, Collins S, Djennad A, Sheppard CL, Borrow R, Fry NK, et al. Rapid increase in  
420 non-vaccine serotypes causing invasive pneumococcal disease in England and Wales, 2000-17: a  
421 prospective national observational cohort study. Lancet Infect Dis. 2018;18(4):441-51.  
422 10. Pneumococcal conjugate vaccine for childhood immunization--WHO position paper. Wkly  
423 Epidemiol Rec. 2007;82(12):93-104.  
424 11. Saha SK, Hossain B, Islam M, Hasanuzzaman M, Saha S, Hasan M, et al. Epidemiology of  
425 Invasive Pneumococcal Disease in Bangladeshi Children Before Introduction of Pneumococcal  
426 Conjugate Vaccine. Pediatr Infect Dis J. 2016;35(6):655-61.  
427 12. Saha SK, Naheed A, El Arifeen S, Islam M, Al-Emran H, Amin R, et al. Surveillance for invasive  
428 Streptococcus pneumoniae disease among hospitalized children in Bangladesh: antimicrobial  
429 susceptibility and serotype distribution. Clin Infect Dis. 2009;48 Suppl 2:S75-81.  
430 13. Arifeen SE, Saha SK, Rahman S, Rahman KM, Rahman SM, Bari S, et al. Invasive  
431 pneumococcal disease among children in rural Bangladesh: results from a population-based  
432 surveillance. Clin Infect Dis. 2009;48 Suppl 2:S103-13.  
433 14. Cheesbrough M. District Laboratory Practice in Tropical Countries. 2nd ed. United  
434 Kingdom: Cambridge University Press; 2006.  
435 15. Verani JR, Domingues CM, de Moraes JC, Brazilian Pneumococcal Conjugate Vaccine  
436 Effectiveness Study G. Indirect cohort analysis of 10-valent pneumococcal conjugate vaccine

- 437 effectiveness against vaccine-type and vaccine-related invasive pneumococcal disease. *Vaccine*.  
438 2015;33(46):6145-8.
- 439 16. Pimenta FC, Roundtree A, Soysal A, Bakir M, du Plessis M, Wolter N, et al. Sequential triplex  
440 real-time PCR assay for detecting 21 pneumococcal capsular serotypes that account for a high  
441 global disease burden. *J Clin Microbiol*. 2013;51(2):647-52.
- 442 17. Andrade AL, Minamisava R, Policena G, Cristo EB, Domingues CM, de Cunto Brandileone  
443 MC, et al. Evaluating the impact of PCV-10 on invasive pneumococcal disease in Brazil: A time-  
444 series analysis. *Hum Vaccin Immunother*. 2016;12(2):285-92.
- 445 18. Cherian T, Mulholland EK, Carlin JB, Ostensen H, Amin R, de Campo M, et al. Standardized  
446 interpretation of paediatric chest radiographs for the diagnosis of pneumonia in epidemiological  
447 studies. *Bull World Health Organ*. 2005;83(5):353-9.
- 448 19. Madhi SA, Klugman KP. World Health Organisation definition of "radiologically-confirmed  
449 pneumonia" may under-estimate the true public health value of conjugate pneumococcal  
450 vaccines. *Vaccine*. 2007;25(13):2413-9.
- 451 20. McCollum ED, Ahmed S, Roy AD, Chowdhury NH, Schuh HB, Rizvi SJR, et al. Effectiveness  
452 of the 10-valent pneumococcal conjugate vaccine against radiographic pneumonia among  
453 children in rural Bangladesh: A case-control study. *Vaccine*. 2020;38(42):6508-16.
- 454 21. Tregnaghi MW, Saez-Llorens X, Lopez P, Abate H, Smith E, Posleman A, et al. Efficacy of  
455 pneumococcal nontypable *Haemophilus influenzae* protein D conjugate vaccine (PHiD-CV) in  
456 young Latin American children: A double-blind randomized controlled trial. *PLoS Med*.  
457 2014;11(6):e1001657.
- 458 22. Riaz A, Mohiuddin S, Husain S, Yousafzai MT, Sajid M, Kabir F, et al. Effectiveness of 10-  
459 valent pneumococcal conjugate vaccine against vaccine-type invasive pneumococcal disease in  
460 Pakistan. *Int J Infect Dis*. 2019;80:28-33.
- 461 23. Domingues CM, Verani JR, Montenegro Renoier EI, de Cunto Brandileone MC, Flannery  
462 B, de Oliveira LH, et al. Effectiveness of ten-valent pneumococcal conjugate vaccine against  
463 invasive pneumococcal disease in Brazil: a matched case-control study. *Lancet Respir Med*.  
464 2014;2(6):464-71.
- 465 24. Peckeu L, van der Ende A, de Melker HE, Sanders EAM, Knol MJ. Impact and effectiveness  
466 of the 10-valent pneumococcal conjugate vaccine on invasive pneumococcal disease among  
467 children under 5 years of age in the Netherlands. *Vaccine*. 2021;39(2):431-7.
- 468 25. Andrews N, Waight PA, Borrow R, Ladhani S, George RC, Slack MP, et al. Using the indirect  
469 cohort design to estimate the effectiveness of the seven valent pneumococcal conjugate vaccine  
470 in England and Wales. *PLoS One*. 2011;6(12):e28435.
- 471 26. Pichon B, Ladhani SN, Slack MP, Segonds-Pichon A, Andrews NJ, Waight PA, et al. Changes  
472 in molecular epidemiology of streptococcus pneumoniae causing meningitis following  
473 introduction of pneumococcal conjugate vaccination in England and Wales. *J Clin Microbiol*.  
474 2013;51(3):820-7.
- 475 27. Park SY, Van Beneden CA, Pilishvili T, Martin M, Facklam RR, Whitney CG, et al. Invasive  
476 pneumococcal infections among vaccinated children in the United States. *J Pediatr*.  
477 2010;156(3):478-83 e2.

478

A

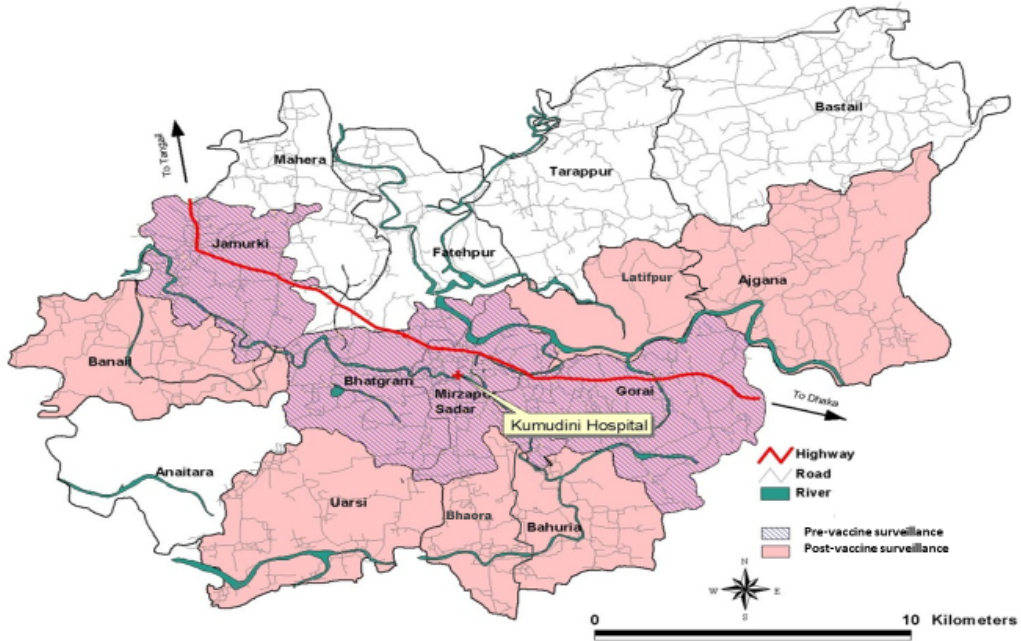

479

B

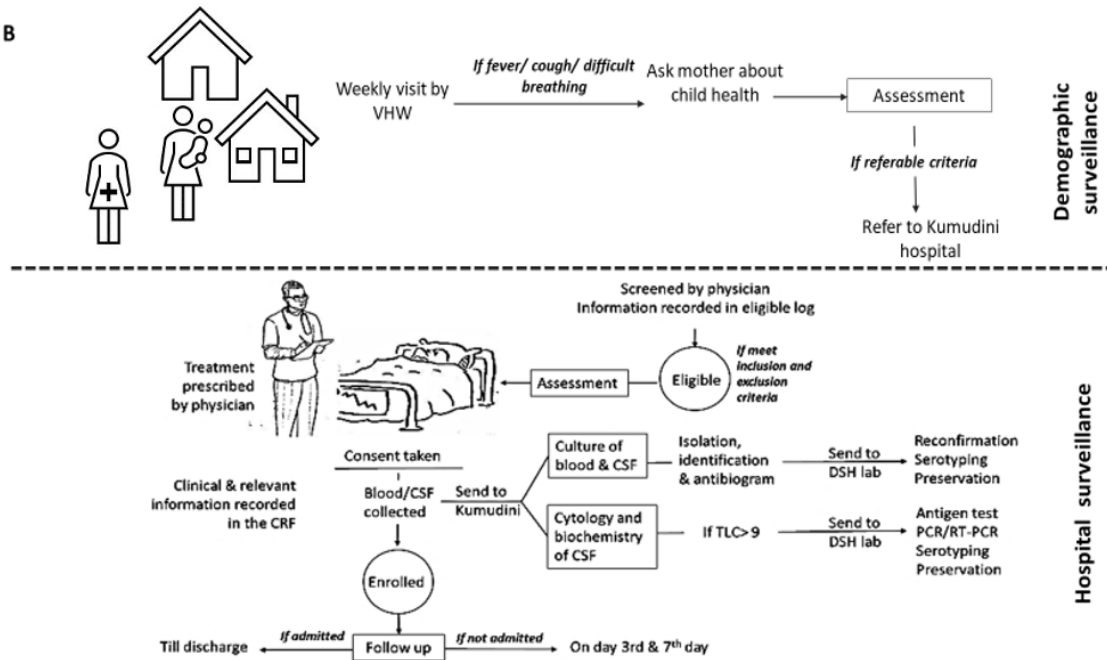

480

481 Figure 1: A. Demographic surveillance area of Mirzapur Upazila, Tangail; B. Study outline of

482

community and hospital-based surveillance

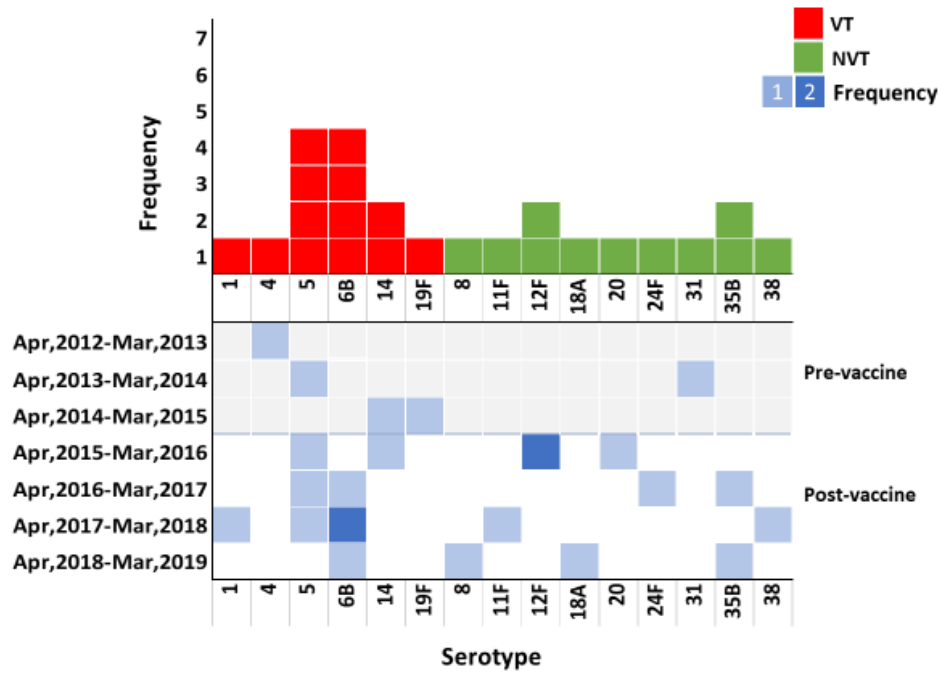

483

484 Figure 2: Serotype distribution of invasive pneumococcal cases with epidemiological year.

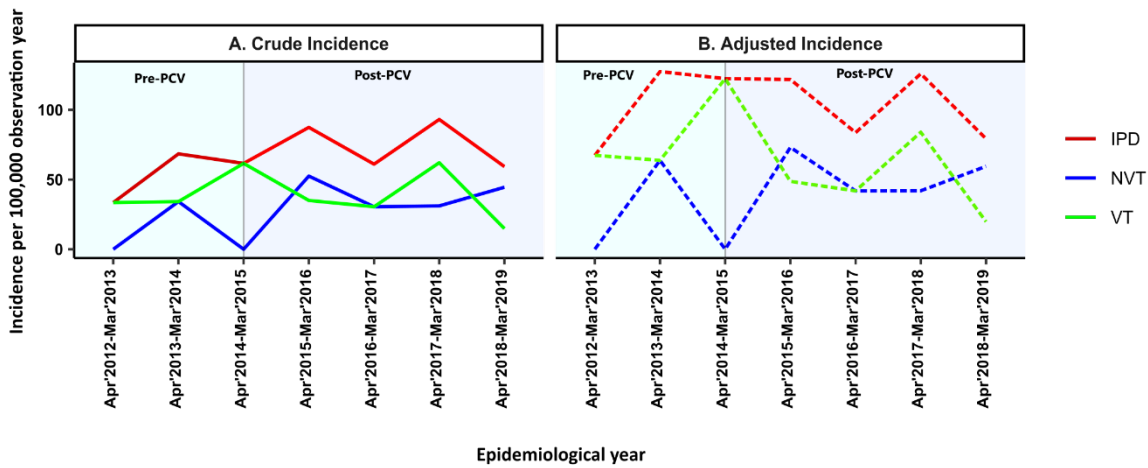

485

486 Figure 3: Changes in incidence for overall, vaccine type and non-vaccine type invasive  
 487 pneumococcal disease between pre and post vaccine periods; A. Crude incidence. B. Adjusted  
 488 incidence

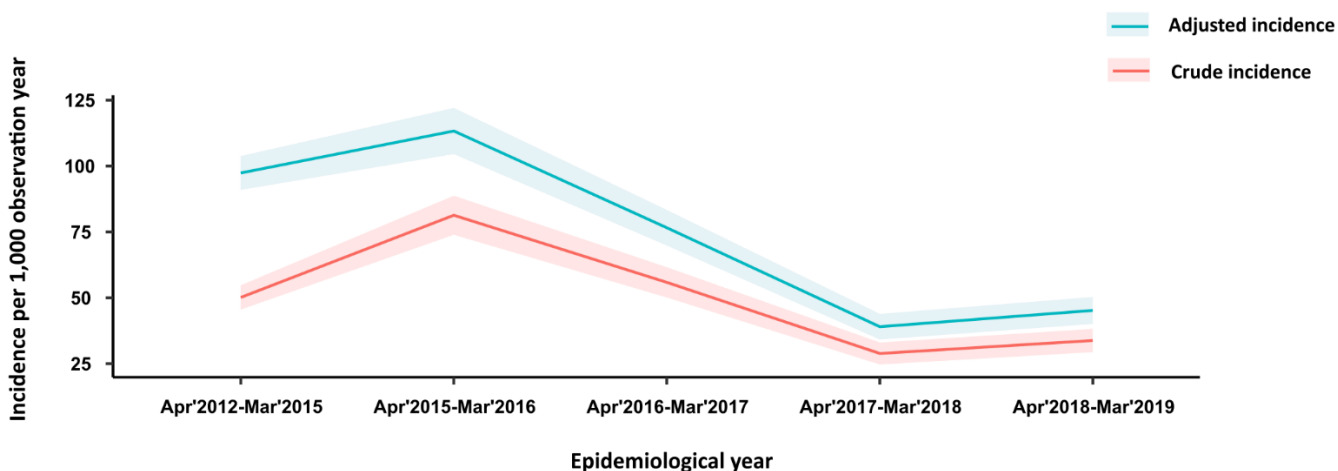

489  
 490 Figure 4: Crude and adjusted incidence of severe pneumonia cases seen at KWMCH among  
 491 demographic surveillance area residents 2-<24 months of age. CI area showed in matched color  
 492 shadow.

493  
 494 Table 1: Case definition and management of children after assessment by VHWs in the Mirzapur  
 495 community.

| Classification                                 | Sign/ Symptoms                                                                                                                                                                                                                                                                                                                                                  | Management                        |
|------------------------------------------------|-----------------------------------------------------------------------------------------------------------------------------------------------------------------------------------------------------------------------------------------------------------------------------------------------------------------------------------------------------------------|-----------------------------------|
| Possible severe Pneumonia/ Very Severe Disease | Cough, difficult breathing and/or fever (<99.5°F), with one of the following: <ul style="list-style-type: none"> <li>▪ Convulsion</li> <li>▪ Fast breathing</li> <li>▪ Chest indrawing</li> <li>▪ Abnormally sleepy or difficult to wake</li> <li>▪ Unconscious</li> <li>▪ Not able to feed breast milk or drink at all</li> <li>▪ Vomits everything</li> </ul> | Urgent refer to Kumudini hospital |
| Possible Pneumonia                             | Fast breathing, but no other danger sign                                                                                                                                                                                                                                                                                                                        | Refer to nearby health facilities |
| No pneumonia                                   | No fast breathing, no danger sign                                                                                                                                                                                                                                                                                                                               | Home care                         |
| Low Fever                                      | Temperature 99.5°F - 100.3°F                                                                                                                                                                                                                                                                                                                                    | Home care                         |



|                                            |                                                                                                                                                                                                                                                                                                                                                                                                                    |                                   |
|--------------------------------------------|--------------------------------------------------------------------------------------------------------------------------------------------------------------------------------------------------------------------------------------------------------------------------------------------------------------------------------------------------------------------------------------------------------------------|-----------------------------------|
| Moderate Fever                             | Temperature 100.4°F - 101.9°F                                                                                                                                                                                                                                                                                                                                                                                      | Urgent refer to Kumudini hospital |
| High fever/ Possible bacteremia            | Temperature 102°F or above                                                                                                                                                                                                                                                                                                                                                                                         | Urgent refer to Kumudini hospital |
| Suspected Meningitis / Very severe disease | Fever (temperature 99.5°F and above) and at least one of the following: <ul style="list-style-type: none"> <li>▪ History of Stiff neck (mentioned by mother)</li> <li>▪ Bulging fontanelle (if &lt; 12 months of age)</li> <li>▪ Unable to drink or breast feed</li> <li>▪ Convulsions</li> <li>▪ Lethargy (abnormally sleepy or difficult to wake)</li> <li>▪ Unconscious</li> <li>▪ Vomits everything</li> </ul> | Urgent refer to Kumudini hospital |

496

497 Table 2: PCV10 effectiveness estimation by number of doses among children 2- <24 months using  
498 the indirect cohort method

|                | Doses                        | Number of children | VT case/Total (VT-vaccinated+ unvaccinated) | NVT case/Total (NVT-vaccinated+ NVT-unvaccinated) | Crude vaccine effectiveness | p-value |
|----------------|------------------------------|--------------------|---------------------------------------------|---------------------------------------------------|-----------------------------|---------|
| <b>Overall</b> | <b>Unvaccinated children</b> | 22                 | 7                                           | 15                                                | n/a                         | n/a     |
|                | <b>1st dose</b>              | 22                 | 5/12 (41.67%)                               | 17/32 (53.13%)                                    | 37.0% (-141.0%, 83.5%)      | 0.498   |
|                | <b>2nd dose + 3rd dose</b>   | 75                 | 9/21 (42.86%)                               | 65/97 (67.01%)                                    | 63.0% (3.3%, 85.9%)         | 0.041   |
|                | <b>Any dose</b>              | 96                 | 14/21 (66.67%)                              | 82/97 (84.54%)                                    | 63.4% (-5.7%, 87.34%)       | 0.072   |

499

500 Supplementary Figure 1: Vaccination status of all IPD cases.

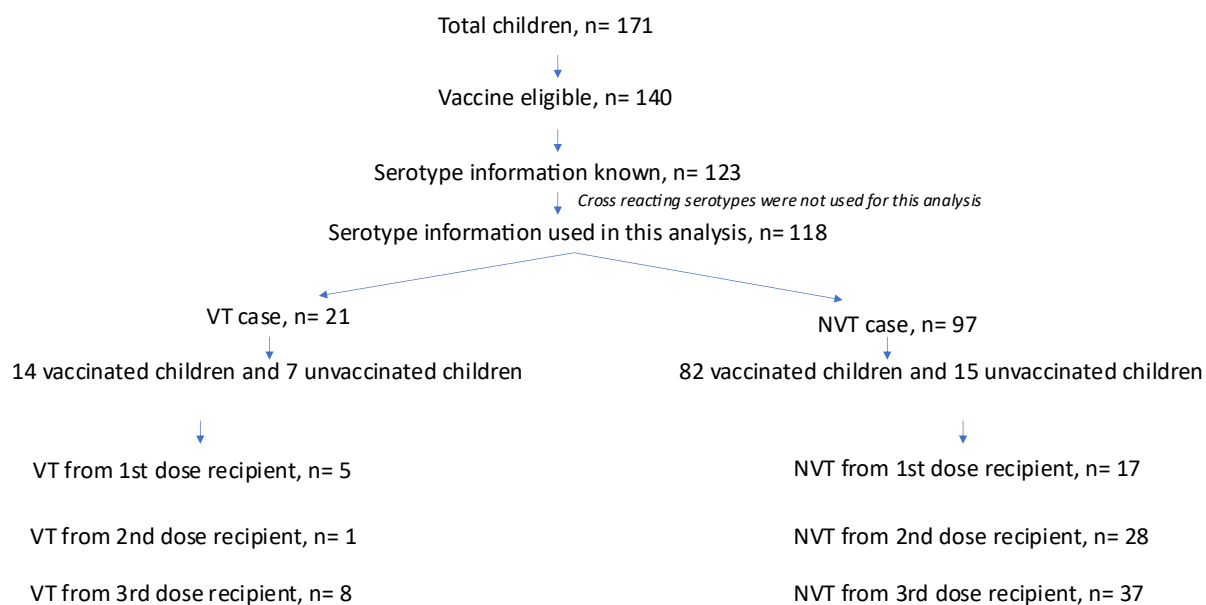

501

502

503 Supplementary Table 1: Summary data of population and hospital based surveillance

| Type of surveillance         | Category                                        | Pre-vaccine       |                   |                   | Post-vaccine      |                   |                   |                   |
|------------------------------|-------------------------------------------------|-------------------|-------------------|-------------------|-------------------|-------------------|-------------------|-------------------|
|                              |                                                 | Apr,2012-Mar,2013 | Apr,2013-Mar,2014 | Apr,2014-Mar,2015 | Apr,2015-Mar,2016 | Apr,2016-Mar,2017 | Apr,2017-Mar,2018 | Apr,2018-Mar,2019 |
| Community based surveillance | No of Enrolled children                         | 1083              | 1039              | 1273              | 2542              | 3134              | 4046              | 7070              |
|                              | Child years of observation                      | 2985              | 2922              | 3246              | 5717              | 6552              | 6441              | 6745              |
|                              | No of follow-up by VHW                          | 212375            | 161507            | 126413            | 247460            | 386735            | 510815            | 646508            |
|                              | Episodes assessed by VHW                        | 10919             | 11060             | 11718             | 20136             | 27671             | 31738             | 30837             |
|                              | Children referred by VHW                        | 927               | 883               | 779               | 2311              | 3085              | 3762              | 3672              |
|                              | Children visited to KWMCH                       | 461               | 474               | 392               | 1659              | 2250              | 2783              | 2745              |
|                              | Compliance rate, %                              | 50%               | 54%               | 50%               | 72%               | 73%               | 74%               | 75%               |
| Hospital based surveillance  | No of eligible children (self and VHW referred) | 1040              | 880               | 697               | 1966              | 2431              | 2046              | 1899              |
|                              | Diagnosed with pneumonia                        | 273               | 218               | 187               | 776               | 1,127             | 555               | 625               |
|                              | 2-5 months (%)                                  | 77 (28%)          | 53 (24%)          | 39 (21%)          | 237 (31%)         | 291 (26%)         | 185 (33%)         | 162 (26%)         |
|                              | 6-11 months (%)                                 | 86 (31%)          | 75 (34%)          | 59 (32%)          | 280 (36%)         | 401 (36%)         | 195 (35%)         | 241 (39%)         |
|                              | 12-23 months (%)                                | 110 (40%)         | 90 (41%)          | 89 (48%)          | 259 (33%)         | 435 (39%)         | 175 (32%)         | 222 (36%)         |
|                              | Diagnosed with severe pneumonia                 | 131               | 192               | 136               | 465               | 366               | 186               | 228               |
|                              | 2-5 months (%)                                  | 59 (45%)          | 86 (45%)          | 49 (36%)          | 202 (43%)         | 112 (31%)         | 72 (39%)          | 78 (34%)          |
|                              | 6-11 months (%)                                 | 40 (31%)          | 50 (26%)          | 40 (30%)          | 136 (29%)         | 134 (37%)         | 60 (32%)          | 68 (30%)          |
|                              | 12-23 months (%)                                | 32 (25%)          | 56 (29%)          | 47 (35%)          | 127 (27%)         | 120 (33%)         | 54 (29%)          | 82 (36%)          |

|                                                   |          |          |          |          |          |          |          |
|---------------------------------------------------|----------|----------|----------|----------|----------|----------|----------|
| <b>Diagnosed with meningitis</b>                  | 56       | 68       | 99       | 86       | 89       | 84       | 54       |
| <b>2-5 months (%)</b>                             | 3 (5%)   | 6 (8%)   | 19 (19%) | 13 (15%) | 8 (9%)   | 10 (12%) | 2 (4%)   |
| <b>6-11 months (%)</b>                            | 14 (25%) | 20 (30%) | 32 (32%) | 27 (31%) | 25 (29%) | 24 (29%) | 22 (41%) |
| <b>12-23 months (%)</b>                           | 39 (70%) | 42 (62%) | 48 (49%) | 46 (53%) | 56 (63%) | 50 (60%) | 30 (56%) |
| <b>No of blood culture from eligible children</b> | 746      | 654      | 451      | 1630     | 2231     | 1882     | 1744     |
| <b>No of pneumococcal isolates</b>                | 1        | 2        | 2        | 5        | 4        | 6        | 4        |
| <b>No of VT</b>                                   | 1        | 1        | 2        | 2        | 2        | 4        | 1        |
| <b>No of NVT</b>                                  | 0        | 1        | 0        | 3        | 2        | 2        | 3        |

504
